# Supplementary material for: Automated clear cell renal carcinoma grade classification with prognostic significance
Source: PubMed Central journal article supplement (PMC6776313; doi:10.1371/journal.pone.0222641), 2019-10-03

### A. Furhman Grading (4-tiered) of the 395 TCGA Cases

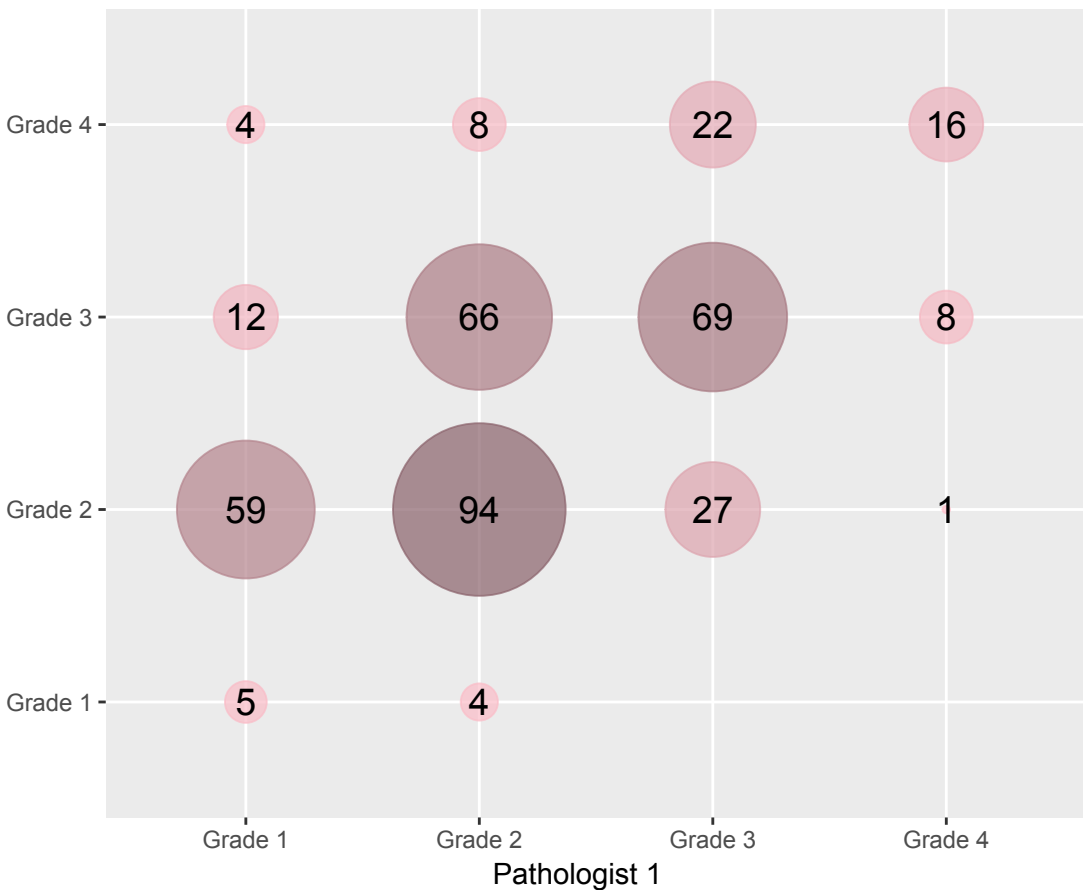

### B. Furhman Grading (2-tiered) of the 395 TCGA Cases

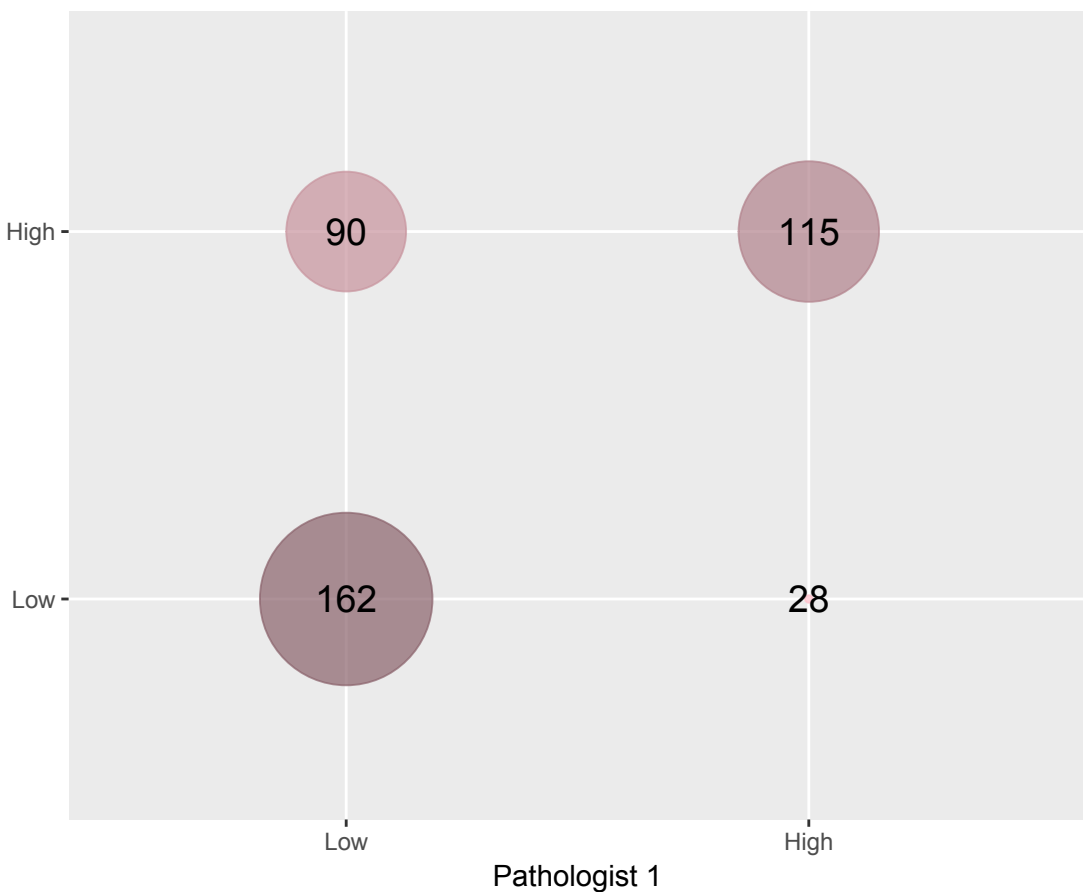

Supplement: pone.0222641.s005.pdf [file pone.0222641.s005.pdf]
